# Supplementary material for: Manganese(II) Oxidizing Bacteria as Whole-Cell Catalyst for β-Keto Ester Oxidation
Source: MDPI journal article supplement (doi:10.3390/ijms21051709), 2020-03-02
Supplement: s1 [file s1]

# Manganese(II) Oxidizing Bacteria as Whole-Cell Catalyst for $\beta$ -Keto Ester Oxidation

Juan Guo <sup>1</sup>, Huan Guo <sup>1</sup>, Jin Liu <sup>1,\*</sup>, Fangrui Zhong <sup>1</sup> and Yuzhou Wu <sup>1,2,\*</sup>

<sup>1</sup> Hubei Key Laboratory of Bioinorganic Chemistry and Materia Medica, School of Chemistry and Chemical Engineering, Huazhong University of Science and Technology, Wuhan 430074, China; guojuan0201@163.com (J.G.); d201980126@hust.edu.cn (H.G.); chemzfr@hust.edu.cn (F.Z.)

<sup>2</sup> Max Planck Institute for Polymer Research, Ackermannweg 10, 55128 Mainz, Germany

\* Correspondence: [liujinlj1987@163.com](mailto:liujinlj1987@163.com) (J.L.); [wuyuzhou@hust.edu.cn](mailto:wuyuzhou@hust.edu.cn) (Y.W.)

Received: 14 February 2020; Accepted: 24 February 2020; Published: date

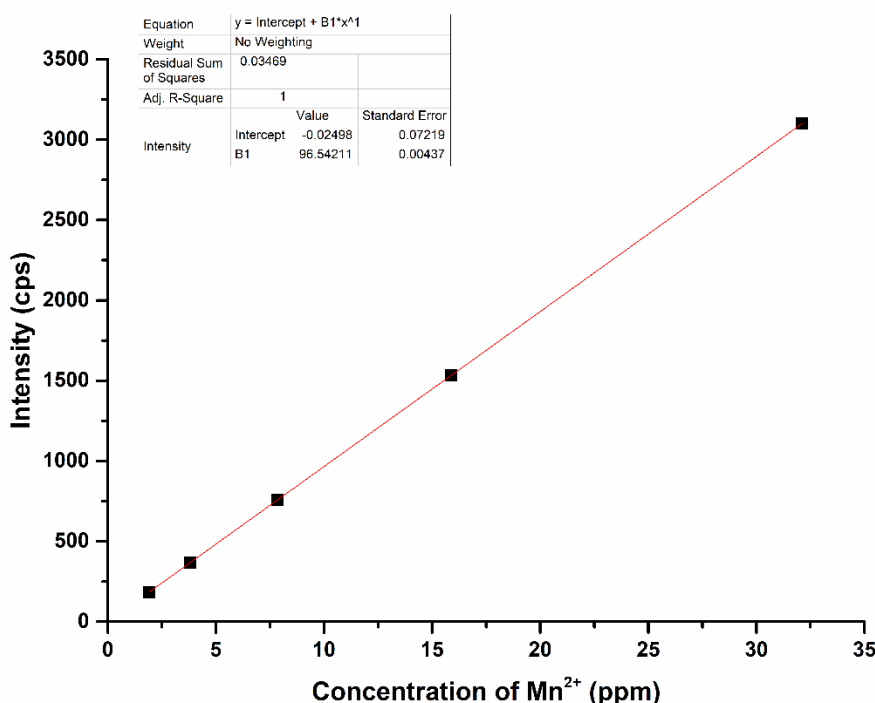

**Figure S1.** Standard curve of  $\text{Mn}^{2+}$  quantification by Inductive Coupled Plasma Optical Emission Spectrometry (ICP-OES);  $y=96.54211x - 0.02498$ ,  $R^2=1.00000$ . (The actual concentration of Mn ions was 7.199 ppm in the 25 ppm dry m-MnB1, therefore, the content of Mn in the dry m-MnB1 was calculated as the following:  $7.199/25=28.8\%$ ).

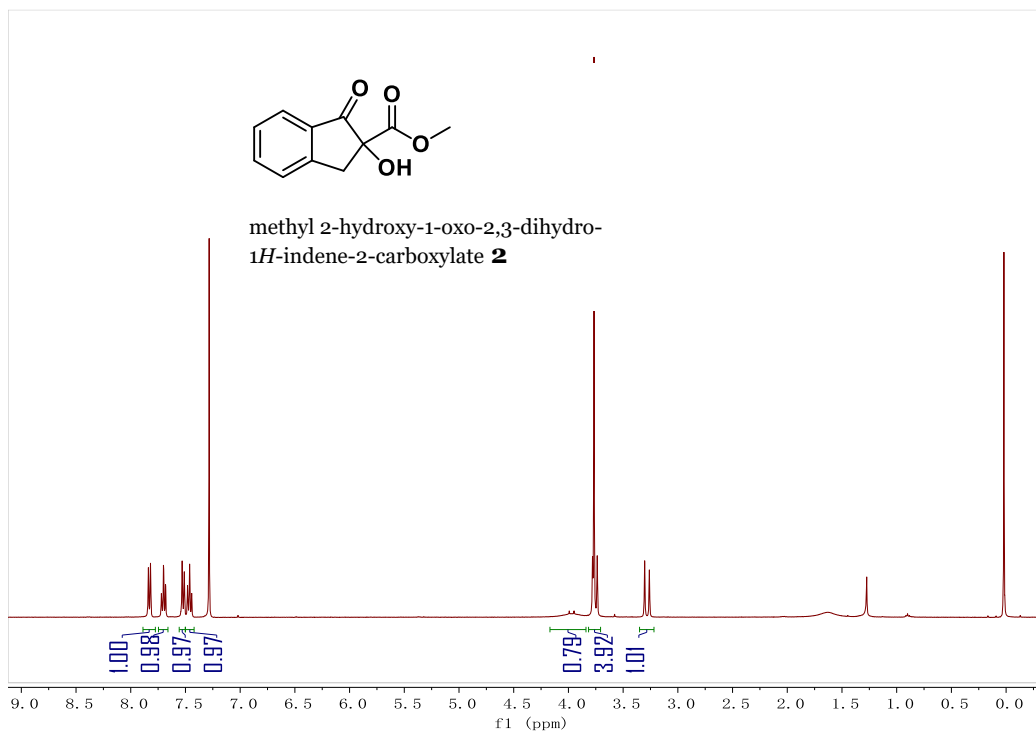

**Figure S2.** <sup>1</sup>H NMR of  $\alpha$ -hydroxy- $\alpha$ -keto ester **2**. <sup>1</sup>H NMR (400 MHz, Chloroform-d)  $\delta$  7.83 (d, *J* = 7.8 Hz, 1H), 7.70 (td, *J* = 7.5, 1.3 Hz, 1H), 7.52 (dt, *J* = 7.8, 1.0 Hz, 1H), 7.50 – 7.42 (m, 1H), 3.95 (s, 1H), 3.77 (m, 4H), 3.28 (d, *J* = 17.2 Hz, 1H).

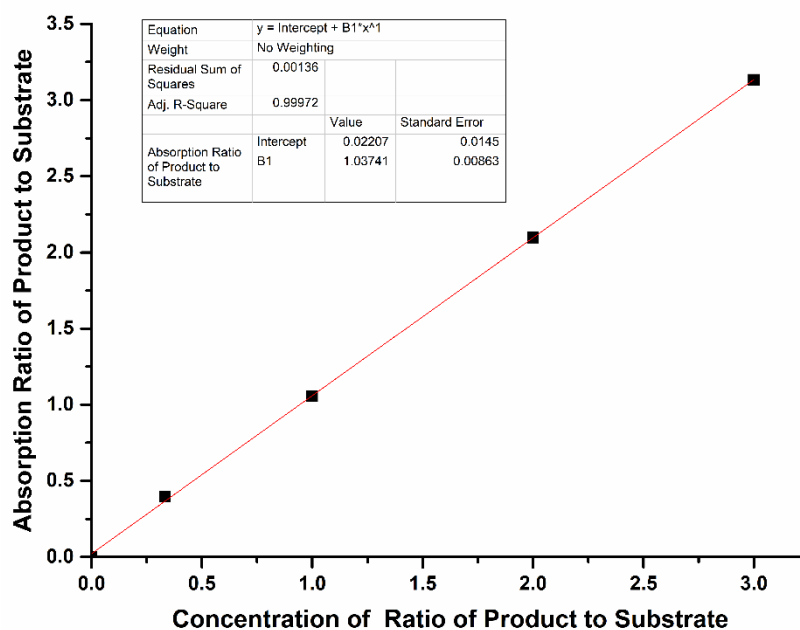

**Figure S3.** Standard curve of concentration of product to substrate which were measured by HPLC;  $y=1.03741x+0.02207$ ,  $R^2=0.99972$ .

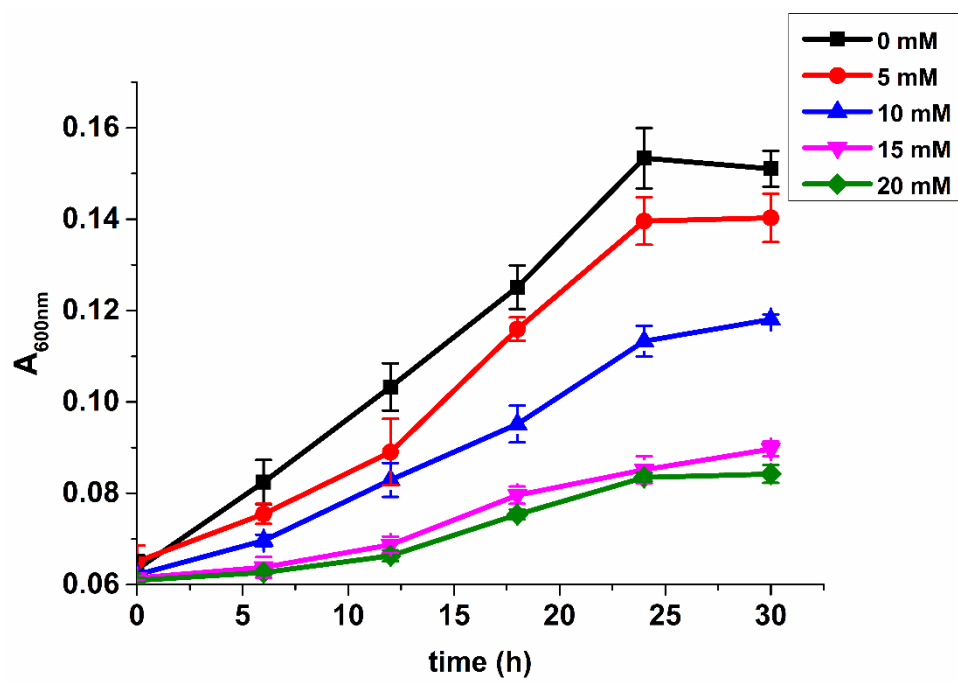

Figure S4. Effects of  $\beta$ -keto ester on the bacteria growth characterized by the OD620nm.
